# Supplementary material
Source: Research Square preprint supplement (doi:10.21203/rs.3.rs-9930014/v1)
Supplement: Supplementary file 1 [file abf97716fcd87d974c8344a4.docx]

Supplementary Materials for ‘The mental health inequalities of extreme heat: a national survey of perceptions, vulnerability, and trust in information sources.’

Table of Contents

[S1 Survey questions used in the analysis 1](#_Toc231484945)

[SCREENING: 1](#_Toc231484946)

[PERCEPTIONS AND EXPERIENCES OF HEAT: 2](#_Toc231484947)

[YOUR HEALTH AND WELLBEING: 6](#_Toc231484948)

[DEMOGRAPHICS: 7](#_Toc231484949)

[S2 Logistic regression models for symptoms reported during the heatwave 11](#_Toc231484950)

[S3 Linear regression models for health concerns 12](#_Toc231484951)

[S4 Logistic regression models for behavioural adaptations during heatwave 13](#_Toc231484952)

[S5 Logistic regression models for sources of information 15](#_Toc231484953)

[S6 Logistic regression model for whether the government is out of touch 16](#_Toc231484954)

# S1 Survey questions used in the analysis

Screening questions, and questions about experiences of hot weather, health and wellbeing, and demographics used in the survey are below, alongside information on where some survey questions were taken from. An additional section of the survey asked about access to green spaces, but these questions are not relevant to the present analyses and so are not included below.

## SCREENING:

1. What is your age?
2. 16-17 [SCREEN OUT]
3. 18-24
4. 25-34
5. 35-44
6. 45-54
7. 55-64
8. 65-74
9. 75+
10. What is your gender?
11. Male
12. Female
13. Other
14. Prefer not to say [SCREEN OUT]
15. Which region or nation do you live in?
16. North East England
17. North West England
18. East Midlands
19. East of England
20. Greater London
21. South East England
22. South West England
23. Wales
24. Scotland
25. Northern Ireland [SCREEN OUT]
26. Yorkshire and the Humber
27. West Midlands
28. What is the highest level of education you have attained so far?
29. Below degree level qualifications (e.g. no formal qualifications, GCSE, A Levels, higher education qualifications such as HNC or HND)

26. Degree level or above qualifications (e.g. undergraduate degree, PGCE, Master's, PhD, postgraduate qualifications)

## PERCEPTIONS AND EXPERIENCES OF HEAT:

1. Thinking about the past 10 years, do you personally feel that temperatures have generally been getting hotter or colder in the UK?
2. Significantly hotter
3. Slightly hotter
4. No difference
5. Slightly colder
6. Significantly colder
7. Don’t know
8. How worried, if at all, are you about the impact of very hot weather on each of the following:[[1]](#footnote-1)
9. Your mental health
10. Your physical health
11. The mental health of your friends and family members
12. The physical health of your friends and family members
13. The health of trees, plants and wildlife in green spaces
14. Very worried
15. Somewhat worried
16. Not very worried
17. Not at all worried
18. Don’t know
19. To what extent do you feel the effects of very hot weather will become easier or more difficult to cope with for you personally over the next five years?
20. Significantly easier to cope with
21. Slightly easier to cope with
22. About the same as now
23. Slightly more difficult to cope with
24. Significantly more difficult to cope with
25. Don’t know
26. Thinking about your experiences generally during periods of very hot weather, which of the following statements comes closest to your experience?

    On balance, very hot weather has …
27. A generally positive impact on my day-to-day life
28. A mix of positive and negative impacts on my day-to-day life
29. A generally negative impact on my day-to-day life
30. No impact on my day-to-day life at all
31. Don’t know

ASK IF Q15 IS CODED AT 1-3

1. Which of the following, if any, do you typically experience during periods of very hot weather? Please tick all that apply

MULTICODE – Randomise order, PIN 10-12 TO BOTTOM

1. Difficulties sleeping
2. Problems with my mental health
3. Problems with my physical health
4. Feeling isolated
5. Difficulty concentrating
6. Feeling irritable[[2]](#footnote-2)
7. Feeling unmotivated[[3]](#footnote-3)
8. Feeling exhausted[[4]](#footnote-4)
9. Feeling uncomfortable[[5]](#footnote-5)
10. Other (please specify)
11. None of the above [EXCLUSIVE]
12. Prefer not to say [EXCLUSIVE]
13. In the last few days, temperatures have reached 34°C in some parts of the UK. In general, would you say that the temperature in your local area has felt too hot, too cold, or about right to go about your day-to-day life?
14. Much too hot
15. Slightly too hot
16. About right
17. Slightly too cold
18. Much too cold
19. Don’t know
20. Which of the following things, if any, have you done in the last few days to adapt to the very hot weather?[[6]](#footnote-6) Please tick all that apply.

MULTICODE – RANDOMISE ORDER, PIN 14-17 TO BOTTOM

1. Changed my work/study habits (eg worked fewer hours, or from a different place)
2. Changed my travel habits (eg avoided traveling altogether, or travelled at different times)
3. Changed my sleep habits (eg slept more, less, or went to sleep later)
4. Changed my eating and drinking habits (eg changed the food I eat, alcohol consumption)
5. Went to stay somewhere else (eg to access air conditioning or stay in cooler places)
6. Spent more time outside my home (eg in green spaces)
7. Used cooling devices (eg air conditioning/fans/shutters) in my home
8. Ventilated my home (eg opening doors and windows to let fresh air through)
9. Changed my social habits (eg socialised less, changed plans with other people)
10. Changed my exercise habits (eg exercised less, changed the sports I do)
11. Took medication to help me cope with heat related issues
12. Visited my GP or healthcare provider due to heat related issues
13. Accessed mental health services
14. Other (please specify)
15. I don’t tend to do anything differently during periods of very hot weather [EXCLUSIVE]
16. Don’t know [EXCLUSIVE]
17. Prefer not to say [EXCLUSIVE]
18. Thinking about actions that the UK government could take to help people adapt to very hot weather, which statement best describes the scale of action you would like to see?
19. The government should be doing a lot more
20. The government should be doing a little more
21. The government is doing the right amount
22. The government should be doing a little less
23. The government should be doing a lot less
24. Don’t know

ASK IF CODED AT 1-5 IN Q19 [OPTIONAL]

1. You mentioned that the government [should be doing more / should be doing less / is doing the right amount] to help people to adapt to very hot weather. In a few words in the box below, please could you say why you think this is the case?

[Open field]

ASK ALL

1. Still thinking about the efforts that the current UK government is taking to address very hot weather and its impacts, please indicate the extent to which you agree or disagree with the following statements

RANDOMISE ORDER

1. The government is out of touch when it comes to how very hot weather is impacting the lives of people in the UK.
2. The government has a responsibility to protect the people who are most vulnerable to the impacts of very hot weather.
3. Strongly agree
4. Somewhat agree
5. Neither agree nor disagree
6. Somewhat disagree
7. Strongly disagree
8. Don’t know
9. In your opinion, which of the following resources would be important for you to have during periods of very hot weather? Please tick all that apply

RANDOMISE ORDER

1. Advice about health and wellbeing during very hot weather
2. Health care services to provide extra support during periods of very hot weather
3. Support for making changes to my home that make it cooler during very hot weather
4. Information about local public buildings that have air conditioning
5. More trees and canopies to increase shade and cool outdoor spaces in my local area
6. Flexibility to work / study from home to avoid commuting during very hot weather
7. Information services/ alerts about very hot weather
8. Businesses / schools relaxing dress codes
9. Other (please specify)
10. None of these
11. Which of the following sources, if any, do you tend to get information from about health and wellbeing during very hot weather? Please tick all that apply

MULTICODE - RANDOMISE ORDER

1. The government
2. My local authority / local council
3. The Met Office
4. The NHS / my GP
5. Others in my community / grassroots initiatives
6. Social media (eg Facebook / Instagram / TikTok / LinkedIn)
7. None of these [EXCLUSIVE]
8. And how much trust do you have, if any, in the following groups to give you relevant and reliable information about health and wellbeing during very hot weather?

RANDOMISE ORDER

1. The government
2. My local authority / local council
3. The Met Office
4. The NHS / my GP
5. Others in my community / grassroots initiatives
6. Social media (eg Facebook / Instagram / TikTok / LinkedIn)
7. A great deal of trust
8. Some trust
9. Not much trust
10. No trust at all
11. Don’t know
12. Local and national governments in the UK have plans to invest in changes that make it easier to cope with the impacts of very hot weather, after more than a decade of record-breaking heatwaves caused by climate change.

In your opinion, which of the following actions should be prioritised to help people in the UK adapt to very hot weather? (rank and order)

RANDOMISE ORDER

1. Reflective/lighter roof surfaces, roads and pavements to prevent heat being absorbed and make the environment cooler
2. More trees and canopies in streets and public spaces to create shade
3. Funding schemes for cooling measures in homes and buildings (eg smart ventilation, insulation, shading and organic materials)
4. Installation of air conditioning in buildings that overheat
5. Stricter regulations to ensure new buildings are designed to stay cool in very hot weather
6. More green spaces to make the ground cooler (eg pocket parks, tree lined streets, nature reserves)
7. More essential services (eg doctors, shops) within walking distance
8. More water features (eg fountains, misting stations, ponds)

## YOUR HEALTH AND WELLBEING:

1. Do you currently have any physical or mental health conditions or illnesses lasting or expected to last 12 months or more?[[7]](#footnote-7)
2. Yes – physical health condition
3. Yes – mental health condition
4. Yes – both physical and mental health conditions
5. No
6. Prefer not to say

ASK IF CODED AT 1-3 IN Q26

1. Do any of your conditions or illnesses reduce your ability to carry out day-to-day activities?[[8]](#footnote-8)
2. Yes, a lot
3. Yes, a little
4. Not at all
5. Prefer not to say

ASK ALL

1. In the next few questions, we would like to know if you have experienced any medical complaints, and how your health has been in general, over the past few weeks. During the past 30 days, how often did you feel… [[9]](#footnote-9)

RANDOMISE ORDER

1. Tired out for no good reason?
2. Nervous?
3. So nervous that nothing could calm you down?
4. Hopeless?
5. Restless or fidgety?
6. So restless that you could not sit still?
7. Depressed?
8. So depressed that nothing could cheer you up?
9. That everything was an effort?
10. Worthless?
11. All of the time
12. Most of the time
13. Some of the time
14. A little of the time
15. None of the time
16. Prefer not to say

## DEMOGRAPHICS:

1. What is your exact age, in years?

[Free-text box]

1. What is your ethnic group?[[10]](#footnote-10)
2. White
3. Mixed or multiple ethnic groups
4. Asian or Asian British
5. Black, Black British, Caribbean or African
6. Other ethnic group
7. Prefer not to say

ASK ALL – RESPONSE SCALES ROUTED FROM Q30

1. What is your ethnic group?

IF CODED AT 1 IN Q30

1. English, Welsh, Scottish, Northern Irish or British
2. Irish
3. Gypsy or Irish Traveller
4. Roma
5. Any other White background (write in)

IF CODED AT 2 IN Q30

1. White and Black Caribbean
2. White and Black African
3. White and Asian
4. Any other Mixed or Multiple background (write in)

IF CODED AT 3 IN Q30

1. Indian
2. Pakistani
3. Bangladeshi
4. Chinese
5. Any other Asian background (write in)

IF CODED AT 4 IN Q30

1. Caribbean
2. African background (write in)
3. Any other Black, Black British or Caribbean background (write in)

IF CODED AT 5 IN Q30

1. Arab
2. Any other ethnic group (write in)
3. Are you involved in any of the following caring activities outside of paid work?[[11]](#footnote-11) Please tick all that apply

MULTICODE

1. Caring for and educating children
2. Caring for elderly relatives/friends
3. Caring for disabled relatives/friends
4. None of these [EXCLUSIVE]
5. Prefer not to say [EXCLUSIVE]
6. Which of the statements below best describes how well you are coping financially at the moment? [[12]](#footnote-12)
7. Living comfortably
8. Not living comfortably, but coping
9. Finding it a little difficult
10. Finding it very difficult
11. Don’t know
12. Prefer not to say
13. Which of the following best describes the type of area you live in?[[13]](#footnote-13)
14. An inner city area
15. A suburban area
16. A town
17. A village
18. Rural or countryside
19. Don’t know
20. Prefer not to say
21. This next question is optional. We would like to link your responses to data on weather and green spaces available in your area. Are you willing to provide your postcode as part of this survey?
22. Yes
23. No

ASK IF CODED AT 1 IN Q35

1. What is your postcode? Please enter your postcode without the last two letters.

[open field – limited to 4 characters]

1. What type of accommodation do you live in?[[14]](#footnote-14)
2. A house or bungalow
3. A self-contained flat, maisonette or apartment
4. A room or rooms (eg bedsit or flatlet)
5. Other (please specify)
6. Prefer not to say
7. Do you own or rent this accommodation?[[15]](#footnote-15)
8. Own outright
9. Own with a mortgage or loan
10. Part-own and part-rent (shared ownership)
11. Rent (through a private landlord)
12. Rent (social housing)
13. Live here rent-free
14. Prefer not to say
15. Which of the following best applies to you?[[16]](#footnote-16) Please tick all that apply

MULTICODE

1. I have access to a private garden
2. I have access to a shared garden
3. I have access to a private outdoor space such as a balcony, yard, patio area
4. I have access to an allotment at a council / community run site
5. I don’t have access to a garden or allotment [EXCLUSIVE]
6. Don’t know [EXCLUSIVE]
7. Prefer not to say [EXCLUSIVE]
8. Do you have any of the following features in your home? Please tick all that apply

RANDOMISE ORDER

1. Air conditioning
2. A fan (ceiling, desk or standing)
3. Shutters on the outside of the building
4. Blinds, blackout curtains or shutters inside the building
5. Insulated windows or double glazing
6. Windows on opposite sides of the building (to create a cross-breeze)
7. Green roof
8. White roof
9. Don’t know [EXCLUSIVE]
10. None of these [EXCLUSIVE]
11. How close to your home is the nearest green space (excluding your private garden, if you have one)?
12. 5 minutes or less
13. 6-15 minutes
14. 16-30 minutes
15. 31-60 minutes
16. More than one hour
17. Don’t know

# S2 Logistic regression models for symptoms reported during the heatwave

|  | Logistic models: symptoms during heatwave | | | | | | | | |
| --- | --- | --- | --- | --- | --- | --- | --- | --- | --- |
|  | Difficulties sleeping | Problems with my mental health | Problems with my physical health | Feeling isolated | Difficulty concentrating | Feeling irritable | Feeling unmotivated | Feeling exhausted | Feeling uncomfortable |
| Physical health condition | 0.0790 | 0.723*** | 1.584*** | 0.653*** | 0.421*** | 0.111 | 0.378*** | 0.322*** | 0.146 |
|  | (0.129) | (0.221) | (0.164) | (0.251) | (0.149) | (0.133) | (0.132) | (0.123) | (0.122) |
| Mental health condition | -0.206 | 1.437*** | 0.844*** | 0.926*** | -0.00271 | 0.189 | 0.305* | 0.133 | -0.0409 |
|  | (0.160) | (0.216) | (0.240) | (0.252) | (0.182) | (0.155) | (0.163) | (0.153) | (0.154) |
| Physical and mental health condition | 0.0796 | 1.945*** | 2.047*** | 1.164*** | 0.700*** | 0.567*** | 0.764*** | 0.604*** | 0.509*** |
|  | (0.163) | (0.205) | (0.190) | (0.250) | (0.174) | (0.162) | (0.158) | (0.159) | (0.163) |
| Age | 0.00761** | -0.0345*** | -0.00371 | -0.0335*** | -0.0332*** | -0.0271*** | 0.00890*** | -0.0109*** | -0.00234 |
|  | (0.00314) | (0.00529) | (0.00472) | (0.00684) | (0.00373) | (0.00315) | (0.00324) | (0.00295) | (0.00294) |
| Gender: women/other | 0.641*** | -0.160 | 0.0449 | -0.372** | 0.140 | 0.518*** | 0.507*** | 0.349*** | 0.404*** |
|  | (0.0937) | (0.159) | (0.142) | (0.182) | (0.111) | (0.0968) | (0.100) | (0.0902) | (0.0906) |
| Region: Greater London | -0.0583 | 0.266* | 0.396*** | 0.196 | 0.165 | 0.274*** | 0.192* | 0.316*** | 0.178* |
|  | (0.0937) | (0.152) | (0.137) | (0.174) | (0.105) | (0.0935) | (0.0996) | (0.0898) | (0.0917) |
| Tenure: own (mortgage) | 0.357*** | -0.132 | 0.167 | -0.143 | 0.237* | 0.142 | 0.202 | -0.0829 | 0.0523 |
|  | (0.121) | (0.204) | (0.182) | (0.240) | (0.142) | (0.125) | (0.126) | (0.115) | (0.116) |
| Tenure: shared ownership | 1.031** | -0.916 | 0.328 | 0.324 | 0.553 | 0.203 | 0.215 | -0.563 | -0.702* |
|  | (0.481) | (0.785) | (0.562) | (0.652) | (0.426) | (0.418) | (0.395) | (0.398) | (0.393) |
| Tenure: rent (private landlord) | 0.303** | -0.219 | -0.221 | -0.240 | 0.142 | -0.148 | -0.233 | -0.149 | -0.0824 |
|  | (0.139) | (0.237) | (0.227) | (0.272) | (0.163) | (0.141) | (0.151) | (0.133) | (0.134) |
| Tenure: rent (social housing) | 0.344** | -0.266 | 0.292 | -0.520* | 0.252 | 0.432*** | 0.0804 | -0.0922 | 0.00379 |
|  | (0.152) | (0.240) | (0.204) | (0.303) | (0.172) | (0.146) | (0.153) | (0.144) | (0.144) |
| Tenure: rent-free | 0.188 | -0.232 | 0.172 | -0.622 | -0.00428 | -0.271 | 0.278 | 0.131 | 0.134 |
|  | (0.263) | (0.378) | (0.339) | (0.484) | (0.272) | (0.253) | (0.251) | (0.255) | (0.252) |
| Constant | -0.927*** | -1.111*** | -2.747*** | -0.934** | -0.343 | -0.416* | -2.361*** | -0.181 | -0.277 |
|  | (0.242) | (0.422) | (0.384) | (0.460) | (0.279) | (0.243) | (0.261) | (0.231) | (0.231) |
|  |  |  |  |  |  |  |  |  |  |
| Observations | 2,635 | 2,635 | 2,635 | 2,635 | 2,635 | 2,635 | 2,635 | 2,635 | 2,635 |
| Pseudo R-squared | 0.0245 | 0.124 | 0.105 | 0.0677 | 0.0663 | 0.0696 | 0.0268 | 0.0237 | 0.0142 |

Robust standard errors in paretheses *** p<0.01, ** p<0.05, * p<0.1

# S3 Linear regression models for health concerns

|  | Linear models: health concerns | |
| --- | --- | --- |
|  | Mental health | Physical health |
| Physical health condition | 0.244*** | 0.464*** |
|  | (0.0487) | (0.0515) |
| Mental health condition | 0.477*** | 0.298*** |
|  | (0.0624) | (0.0590) |
| Physical and mental health condition | 0.604*** | 0.675*** |
|  | (0.0663) | (0.0637) |
| Age | -0.0171*** | -0.0116*** |
|  | (0.00119) | (0.00126) |
| Gender: women/other | 0.0684* | 0.116*** |
|  | (0.0362) | (0.0371) |
| Region: Greater London | 0.188*** | 0.132*** |
|  | (0.0390) | (0.0401) |
| Tenure: own (mortgage) | -0.0630 | -0.0368 |
|  | (0.0471) | (0.0480) |
| Tenure: shared ownership | -0.257 | -0.0947 |
|  | (0.160) | (0.191) |
| Tenure: rent (private landlord) | -0.0851 | -0.0949* |
|  | (0.0551) | (0.0577) |
| Tenure: rent (social housing) | 0.0762 | 0.0372 |
|  | (0.0589) | (0.0587) |
| Tenure: rent-free | -0.203** | -0.226** |
|  | (0.0983) | (0.0966) |
| Constant | 2.777*** | 2.562*** |
|  | (0.0979) | (0.101) |
|  |  |  |
| Observations | 2,811 | 2,813 |
| Pseudo R-squared | 0.186 | 0.127 |

Robust standard errors in paretheses *** p<0.01, ** p<0.05, * p<0.1

# S4 Logistic regression models for behavioural adaptations during heatwave

|  | Logistic models: behavioural adaptations during heatwave | | | | | | | | | | | | |
| --- | --- | --- | --- | --- | --- | --- | --- | --- | --- | --- | --- | --- | --- |
|  | Changed my work/study habits | Changed my travel habits | Changed my sleep habits | Changed my eating and drinking habits | Went to stay somewhere else | Spent more time outside my home | Used cooling devices | Ventilated my home | Changed my social habits | Changed my exercise habits | Took medication to help me cope with heat related issues | Visited my GP or healthcare provider due to heat related issues | Accessed mental health services |
| Physical health condition | 0.404* | 0.602*** | 0.349*** | 0.334*** | 0.566*** | -0.329*** | 0.0975 | 0.0330 | 0.480*** | 0.171 | 1.151*** | 0.970*** | 0.972*** |
|  | (0.227) | (0.172) | (0.134) | (0.128) | (0.193) | (0.127) | (0.119) | (0.118) | (0.178) | (0.143) | (0.263) | (0.295) | (0.333) |
| Mental health condition | 0.323 | 0.803*** | 0.238 | 0.439*** | 0.217 | -0.114 | -0.333** | 0.00754 | 0.464** | -0.217 | 1.017*** | 0.588 | 1.586*** |
|  | (0.273) | (0.205) | (0.172) | (0.161) | (0.249) | (0.161) | (0.154) | (0.153) | (0.209) | (0.202) | (0.317) | (0.369) | (0.317) |
| Physical and mental health condition | 0.500* | 0.954*** | 0.714*** | 0.678*** | 0.234 | -0.396** | 0.0480 | 0.0292 | 0.657*** | 0.0709 | 1.497*** | 1.137*** | 1.344*** |
|  | (0.266) | (0.195) | (0.162) | (0.161) | (0.240) | (0.168) | (0.153) | (0.145) | (0.206) | (0.188) | (0.290) | (0.334) | (0.341) |
| Age | -0.0457*** | -0.000993 | -0.00931*** | -0.000363 | -0.0402*** | -0.00803*** | -0.00942*** | 0.0207*** | -0.0239*** | -0.00204 | -0.0380*** | -0.0667*** | -0.0543*** |
|  | (0.00624) | (0.00476) | (0.00341) | (0.00319) | (0.00503) | (0.00296) | (0.00283) | (0.00288) | (0.00465) | (0.00359) | (0.00739) | (0.00819) | (0.00803) |
| Gender: women/other | -0.0790 | 0.328** | 0.229** | 0.440*** | -0.0428 | -0.0260 | 0.433*** | 0.386*** | 0.244* | 0.289*** | -0.313 | -0.657*** | -1.157*** |
|  | (0.178) | (0.135) | (0.102) | (0.0982) | (0.147) | (0.0915) | (0.0875) | (0.0875) | (0.135) | (0.111) | (0.218) | (0.247) | (0.274) |
| Region: Greater London | 0.655*** | 0.580*** | 0.133 | 0.312*** | 0.672*** | 0.0735 | 0.504*** | 0.186** | 0.425*** | 0.451*** | 0.293 | 0.142 | 0.649*** |
|  | (0.155) | (0.126) | (0.101) | (0.0969) | (0.131) | (0.0892) | (0.0870) | (0.0871) | (0.126) | (0.102) | (0.200) | (0.228) | (0.221) |
| Tenure: own (mortgage) | -0.0575 | 0.126 | 0.124 | 0.0245 | -0.0242 | -0.0556 | 0.204* | -0.00673 | 0.000960 | 0.233* | -0.288 | -0.123 | 0.188 |
|  | (0.201) | (0.175) | (0.130) | (0.126) | (0.185) | (0.116) | (0.113) | (0.111) | (0.175) | (0.134) | (0.290) | (0.287) | (0.329) |
| Tenure: shared ownership | -1.534** | -0.438 | 0.126 | 0.229 | 0.155 | -0.262 | -0.538 | 0.208 |  | 0.199 | -0.341 |  |  |
|  | (0.755) | (0.744) | (0.450) | (0.400) | (0.622) | (0.444) | (0.427) | (0.390) |  | (0.454) | (0.990) |  |  |
| Tenure: rent (private landlord) | -0.157 | 0.192 | 0.351** | 0.129 | -0.0497 | -0.230* | 0.0857 | 0.0280 | 0.101 | -0.304* | -0.412 | -0.628* | 0.481 |
|  | (0.234) | (0.201) | (0.144) | (0.141) | (0.204) | (0.136) | (0.129) | (0.130) | (0.189) | (0.169) | (0.354) | (0.380) | (0.339) |
| Tenure: rent (social housing) | -0.914*** | -0.0559 | 0.0688 | -0.271* | -0.256 | -0.477*** | -0.136 | -0.327** | -0.190 | -0.262 | 0.185 | -0.471 | 0.426 |
|  | (0.333) | (0.214) | (0.158) | (0.157) | (0.245) | (0.156) | (0.138) | (0.135) | (0.215) | (0.182) | (0.296) | (0.370) | (0.365) |
| Tenure: rent-free | -0.680 | -0.157 | -0.444 | -0.555* | -0.517 | -0.371 | 0.201 | 0.131 | 0.0237 | -0.259 | -1.837** | -3.161*** | -0.226 |
|  | (0.416) | (0.374) | (0.295) | (0.296) | (0.368) | (0.253) | (0.239) | (0.233) | (0.315) | (0.306) | (0.851) | (1.046) | (0.657) |
| Constant | -0.704 | -2.990*** | -1.376*** | -1.893*** | -0.711* | -0.109 | -0.657*** | -1.434*** | -1.648*** | -1.848*** | -1.516*** | 0.107 | -0.582 |
|  | (0.440) | (0.374) | (0.266) | (0.265) | (0.372) | (0.231) | (0.227) | (0.226) | (0.350) | (0.294) | (0.489) | (0.644) | (0.637) |
|  |  |  |  |  |  |  |  |  |  |  |  |  |  |
| Observations | 2,857 | 2,857 | 2,857 | 2,857 | 2,857 | 2,857 | 2,857 | 2,857 | 2,825 | 2,857 | 2,857 | 2,825 | 2,825 |
| Pseudo R-squared | 0.0939 | 0.0322 | 0.0223 | 0.0211 | 0.0768 | 0.0125 | 0.0265 | 0.0266 | 0.0464 | 0.0144 | 0.0933 | 0.137 | 0.155 |

Robust standard errors in paretheses *** p<0.01, ** p<0.05, * p<0.1

# S5 Logistic regression models for sources of information

|  | Logistic models: sources of information | | | | | |
| --- | --- | --- | --- | --- | --- | --- |
|  | The government | My local authority / local council | The Met Office | The NHS / my GP | Others in my community / grassroots initiatives | Social media |
| Physical health condition | 0.247* | 0.0145 | 0.0266 | 0.129 | 0.417** | 0.0506 |
|  | (0.147) | (0.159) | (0.119) | (0.135) | (0.199) | (0.141) |
| Mental health condition | -0.299 | -0.415* | -0.257 | -0.275 | 0.342 | -0.188 |
|  | (0.207) | (0.217) | (0.161) | (0.177) | (0.228) | (0.174) |
| Physical and mental health condition | -0.0419 | 0.00904 | -0.197 | 0.408** | 0.376 | -0.0108 |
|  | (0.198) | (0.193) | (0.156) | (0.162) | (0.239) | (0.175) |
| Age | -0.0329*** | -0.0277*** | 0.0181*** | -0.0337*** | -0.0464*** | -0.0533*** |
|  | (0.00365) | (0.00393) | (0.00288) | (0.00338) | (0.00587) | (0.00370) |
| Gender: women/other | -0.542*** | -0.393*** | 0.0586 | -0.318*** | -0.319** | 0.215** |
|  | (0.109) | (0.114) | (0.0893) | (0.0987) | (0.153) | (0.0997) |
| Region: Greater London | 0.606*** | 0.628*** | -0.184** | 0.286*** | 0.569*** | 0.434*** |
|  | (0.102) | (0.106) | (0.0894) | (0.0939) | (0.131) | (0.0928) |
| Tenure: own (mortgage) | -0.393*** | -0.131 | 0.284** | -0.161 | -0.217 | -0.209* |
|  | (0.141) | (0.144) | (0.114) | (0.124) | (0.169) | (0.125) |
| Tenure: shared ownership | -0.218 | -2.181*** | 0.203 | -0.757 |  | 0.0393 |
|  | (0.478) | (0.741) | (0.382) | (0.519) |  | (0.403) |
| Tenure: rent (private landlord) | -0.420*** | 0.0254 | 0.207 | -0.135 | -0.437* | -0.0539 |
|  | (0.159) | (0.168) | (0.133) | (0.143) | (0.225) | (0.146) |
| Tenure: rent (social housing) | -0.354* | 0.121 | 0.132 | -0.308* | -0.668*** | -0.406** |
|  | (0.182) | (0.182) | (0.141) | (0.163) | (0.253) | (0.166) |
| Tenure: rent-free | -1.066*** | -1.313*** | 0.241 | -0.813*** | -1.380*** | -0.637** |
|  | (0.331) | (0.404) | (0.256) | (0.277) | (0.492) | (0.266) |
| Constant | 0.988*** | 0.183 | -1.486*** | 1.074*** | 0.227 | 1.263*** |
|  | (0.274) | (0.287) | (0.232) | (0.253) | (0.389) | (0.254) |
|  |  |  |  |  |  |  |
| Observations | 2,857 | 2,857 | 2,857 | 2,857 | 2,825 | 2,857 |
| Pseudo R-squared | 0.0664 | 0.0562 | 0.0204 | 0.0582 | 0.0932 | 0.132 |

Robust standard errors in paretheses *** p<0.01, ** p<0.05, * p<0.1

# S6 Logistic regression model for whether the government is out of touch

|  | Logistic model |
| --- | --- |
|  | Agree: The government is out of touch out of touch when it comes to how hot weather is impacting people’s lives |
| Physical health condition | 0.317*** |
|  | (0.116) |
| Mental health condition | 0.804*** |
|  | (0.163) |
| Physical and mental health condition | 0.535*** |
|  | (0.154) |
| Age | -0.0139*** |
|  | (0.00285) |
| Gender: women/other | 0.0161 |
|  | (0.0865) |
| Region: Greater London | 0.176** |
|  | (0.0868) |
| Tenure: own (mortgage) | 0.214* |
|  | (0.112) |
| Tenure: shared ownership | 0.160 |
|  | (0.390) |
| Tenure: rent (private landlord) | 0.244* |
|  | (0.129) |
| Tenure: rent (social housing) | 0.221 |
|  | (0.138) |
| Tenure: rent-free | 0.298 |
|  | (0.238) |
| Constant | 0.394* |
|  | (0.222) |
|  |  |
| Observations | 2,857 |
| Pseudo R-squared | 0.0339 |

Robust standard errors in paretheses *** p<0.01, ** p<0.05, * p<0.1

1. Adapted from climate change concern question in [Public Trust in Expertise in the Context of Climate Change and COVID-19 (PERITIA)](https://kclpure.kcl.ac.uk/portal/en/datasets/public-trust-in-expertise-in-the-context-of-climate-change-and-co). [↑](#footnote-ref-1)
2. Added this one from the Hopeful Futures peer research [↑](#footnote-ref-2)
3. Added this one from the Hopeful Futures peer research [↑](#footnote-ref-3)
4. Added this one from the Hopeful Futures peer research [↑](#footnote-ref-4)
5. Added from soft launch open field responses [↑](#footnote-ref-5)
6. Question stem adapted from KCL cost of living survey. See [application here.](https://onlinelibrary.wiley.com/doi/full/10.1111/spol.13079?msockid=39fb8768c6e06f902b4093f4c7b86e0f) Brought in some findings from the peer research in Hopeful Futures as well: <https://www.kcl.ac.uk//policy-institute/assets/feeling-the-heat.pdf> [↑](#footnote-ref-6)
7. Adapted from [2021 Census, individual questionnaire](https://www.ons.gov.uk/census/censustransformationprogramme/questiondevelopment/census2021paperquestionnaires) [↑](#footnote-ref-7)
8. [2021 Census, individual questionnaire](https://www.ons.gov.uk/census/censustransformationprogramme/questiondevelopment/census2021paperquestionnaires) [↑](#footnote-ref-8)
9. [Kessler Psychological Distress Scale (K10)](https://www.cataloguementalhealth.ac.uk/?content=7#:~:text=Kessler%20Psychological%20Distress%20Scale%3A%20K10%20and%20K6,-The%20K10%20(10&text=Items%20are%20scored%201%2D5,and%20without%20interview%2Didentified%20disorder) [↑](#footnote-ref-9)
10. 2021 census [↑](#footnote-ref-10)
11. Adapted from European Quality of Life Survey [↑](#footnote-ref-11)
12. https://yougov.co.uk/topics/economy/trackers/how-well-are-brits-coping-financially [↑](#footnote-ref-12)
13. Based on Understanding Society. [↑](#footnote-ref-13)
14. Adapted from [English Housing Survey](https://assets.publishing.service.gov.uk/media/67484681ebabe47136b3a104/EHS_Questionnaire_documentation_2023-24.pdf). Drop downs not asked. [↑](#footnote-ref-14)
15. [↑](#footnote-ref-15)
16. [The People and Nature Survey For England](https://publications.naturalengland.org.uk/publication/6382837173583872) [↑](#footnote-ref-16)
